# Supplementary material
Source: PubMed Central journal article supplement (PMC3658555)
Supplement: cb400103f_si_001.pdf [file cb400103f_si_001.pdf]

## Supplementary Information

### **Conformation guides molecular efficacy in docking screens of activated beta-2 adrenergic G protein coupled receptor**

Dahlia R Weiss<sup>1,†</sup>, SeungKirl Ahn<sup>2,†</sup>, Maria F Sassano<sup>3</sup>, Andrew Kleist<sup>2</sup>, Xiao Zhu<sup>2</sup>, Ryan Strachan<sup>2</sup>, Bryan L Roth<sup>3</sup>, Robert J Lefkowitz<sup>2,4,5\*</sup>, Brian K Shoichet<sup>1,\*</sup>

<sup>1</sup>Department of Pharmaceutical Chemistry, University of California San Francisco, San Francisco, CA 94158-2550

Department of <sup>2</sup>Medicine and <sup>4</sup>Biochemistry, <sup>5</sup>Howard Hughes Medical Institute, Duke University Medical Center, Durham, NC 27710

<sup>3</sup>Department of Pharmacology and National Institute of Mental Health Psychoactive Drug Screening Program School of Medicine, University of North Carolina, Chapel Hill, NC 27599

<sup>†</sup>Both authors contributed equally to this work.

\*corresponding author (shoichet@cgl.ucsf.edu, [lefko001@receptor-biol.duke.edu](mailto:lefko001@receptor-biol.duke.edu))

## Methods

**Selection of high-ranking molecules for experimental testing.** In docking screens top-ranking molecules (~1000) are routinely evaluated manually to select those most likely to be true hits. The trained computational chemist must often integrate several, sometimes contradictory, considerations that are not included in the DOCK scoring function. These considerations have been discussed at length <sup>1,2</sup>. Common reasons to reject a molecule despite a high-ranking DOCK score include:

High internal energy of the molecule

High flexibility of the molecule

Stranded polar groups that do not interact with the protein

Wrong tautomerization state

Wrong protonation state

Broken molecules with missing or disconnected atoms

No available vendor found

Compound is not novel with respect to known ligands

Compound is not diverse with respect to other compounds picked for testing

**Table S1: Compounds tested from virtual screening of the active  $\beta$ 2AR structure.**

| # | ZINC ID   | Structure                                                                           | Tc <sup>a</sup> | Rank active structure | Rank inactive structure |
|---|-----------|-------------------------------------------------------------------------------------|-----------------|-----------------------|-------------------------|
| 1 | C01768066 | 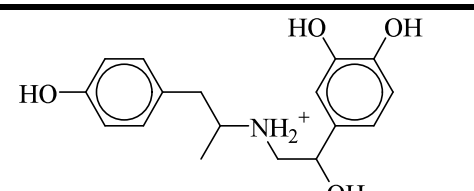  | 0.74            | 57                    | 31320                   |
| 2 | C04993730 |  | 0.36            | 178                   | 86179                   |
| 3 | C47509526 |  | 0.32            | 393                   | 31192                   |
| 4 | C01673161 |  | 0.47            | 451                   | 87426                   |

|    |           |                                                                                     |      |      |        |
|----|-----------|-------------------------------------------------------------------------------------|------|------|--------|
| 5  | C32581901 | 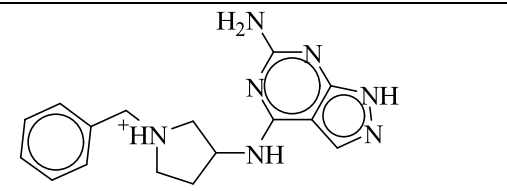   | 0.25 | 844  | 135256 |
| 6  | C55178789 |    | 0.24 | 869  | 40820  |
| 7  | C31810657 |    | 0.29 | 958  | 58285  |
| 8  | C44974609 |    | 0.27 | 1010 | 291620 |
| 9  | C01588041 |    | 0.23 | 966  | 105841 |
| 10 | C04453683 |  | 0.30 | 1082 | 50149  |
| 11 | C30516172 |  | 0.27 | 1090 | 73794  |
| 12 | C01704228 |  | 1    | 1197 | 9909   |
| 13 | C01704406 |  | 0.22 | 1201 | 687679 |
| 14 | C03999871 |  | 0.29 | 1545 | 20214  |

|    |           |                                                                                     |      |                  |        |
|----|-----------|-------------------------------------------------------------------------------------|------|------------------|--------|
| 15 | C46089688 | 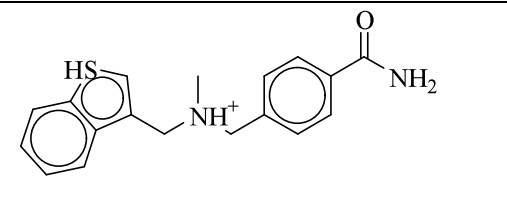   | 0.26 | 2003             | 118503 |
| 16 | C35047812 |    | 0.38 | 2311             | 108426 |
| 17 | C15635522 |    | 0.29 | 3689             | 116195 |
| 18 | C11799337 |    | 0.35 | 28 <sup>b</sup>  | 5242   |
| 19 | C40457267 |   | 0.19 | 47 <sup>b</sup>  | 30107  |
| 20 | C01567711 |  | 0.26 | 121 <sup>b</sup> | 11362  |
| 21 | C37537197 |  | 0.32 | 157 <sup>b</sup> | 701    |
| 22 | C06525260 |  | 0.52 | 397 <sup>b</sup> | 13100  |

<sup>a</sup> Tanimoto coefficient ( $T_c$ ) calculated for all known B2AR ligands in the ChEMBL 15 database

<sup>b</sup> "fragment-like" screen

**Table S2: Co-crystal ligand BI-167107 and six additional known partially biased  $\beta$ 2AR ligands used for the 2D Similarity Ensemble Approach (SEA).**

| #          | Structure                                                                            |
|------------|--------------------------------------------------------------------------------------|
| BI167107   | 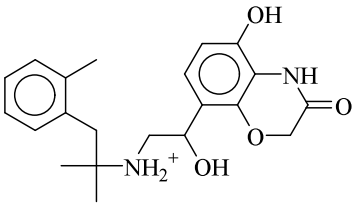    |
| Formoterol |     |
| Salmeterol |    |
| TD3227     |    |
| THR144877  |  |
| Carmoterol |   |
| Zinterol   |   |

**Table S3: Compounds tested for biased agonism to the  $\beta$ 2AR, selected from a 2D chemical similarity search.**

| #     | ZINCID    | Structure                                                                           | $T_c^a$ |
|-------|-----------|-------------------------------------------------------------------------------------|---------|
| SEA01 | C00214190 | 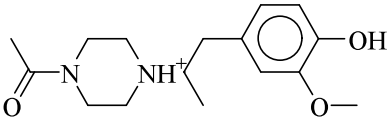   | 0.28    |
| SEA02 | C04022531 |    | 0.33    |
| SEA03 | C04810679 |    | 0.38    |
| SEA04 | C53945771 |    | 0.31    |
| SEA05 | C04850887 |   | 0.39    |
| SEA06 | C19872322 |  | 0.34    |
| SEA07 | C00118342 |  | 0.35    |
| SEA08 | C19924993 |  | 0.34    |
| SEA09 | C00085165 |  | 0.29    |

|       |           |  |      |
|-------|-----------|--|------|
| SEA10 | C01871693 |  | 0.33 |
| SEA11 | C01667040 |  | 0.36 |
| SEA12 | C01668555 |  | 0.33 |
| SEA13 | C01593542 |  | 0.48 |
| SEA14 | C01594041 |  | 0.28 |
| SEA15 | C01820508 |  | 0.70 |
| SEA16 | C04786375 |  | 0.32 |
| SEA17 | C22030114 |  | 0.38 |
| SEA18 | C07987502 |  | 0.31 |

|       |           |                                                                                     |      |
|-------|-----------|-------------------------------------------------------------------------------------|------|
| SEA19 | C35112775 | 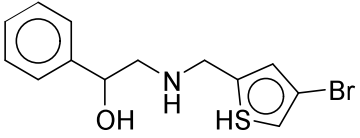   | 0.36 |
| SEA20 | C60634384 |    | 0.35 |
| SEA21 | C60844264 |    | 0.30 |
| SEA22 | C47725577 |   | 0.33 |
| SEA23 | C37749077 |   | 0.40 |
| SEA24 | C56142982 |  | 0.32 |
| SEA25 | C60818125 |  | 0.31 |
| SEA26 | C06703797 |  | 0.37 |



|       |           |                                                                                   |      |
|-------|-----------|-----------------------------------------------------------------------------------|------|
| SEA27 | C16477523 | 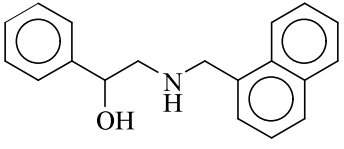 | 0.41 |
| SEA28 | C13731635 |  | 0.34 |
| SEA29 | C32616882 |  | 0.35 |
| SEA30 | C08728035 |  | 0.57 |

<sup>a</sup> Tanimoto coefficient ( $T_c$ ) calculated for all known  $\beta$ 2AR ligands in the ChEMBL 15 database

**Table S4: Compounds tested from virtual screening of the active DRD2 model.**

| #  | ZINC ID   | Structure                                                                           | T <sub>c</sub> <sup>a</sup><br>DRD2 | Rank<br>active<br>model | Rank<br>inactive<br>structure |
|----|-----------|-------------------------------------------------------------------------------------|-------------------------------------|-------------------------|-------------------------------|
| 23 | C69067842 | 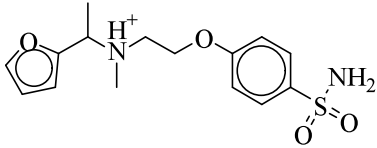   | 0.29                                | 181                     | 20673                         |
| 24 | C65513278 |    | 0.40                                | 735                     | 18882                         |
| 25 | C65435880 |    | 0.49                                | 2026                    | 11238                         |
| 26 | C20864202 |   | 0.28                                | 2079                    | 11808                         |
| 27 | C58405280 |  | 0.37                                | 3211                    | 278164                        |
| 28 | C40051228 |  | 0.48                                | 5965                    | 27188                         |
| 29 | C65403691 |  | 0.36                                | 7633                    | 91253                         |
| 30 | C54993535 |  | 0.42                                | 11254                   | 165851                        |
| 31 | C05499507 |  | 0.21                                | 11758                   | 24380                         |

|    |           |  |      |                  |        |
|----|-----------|--|------|------------------|--------|
| 32 | C65461088 |  | 0.5  | 13340            | 55040  |
| 33 | C04244028 |  | 0.46 | 14406            | 41726  |
| 34 | C67715357 |  | 0.48 | 15416            | 848018 |
| 35 | C68768373 |  | 0.30 | 15608            | 62989  |
| 36 | C06525260 |  | 0.52 | 827 <sup>b</sup> | 12256  |
| 37 | C69000627 |  | 0.27 | 883 <sup>b</sup> | 8896   |

<sup>a</sup> Tanimoto coefficient ( $T_c$ ) calculated for all known DRD2 ligands in the ChEMBL 15 database

<sup>b</sup> "fragment-like" screen

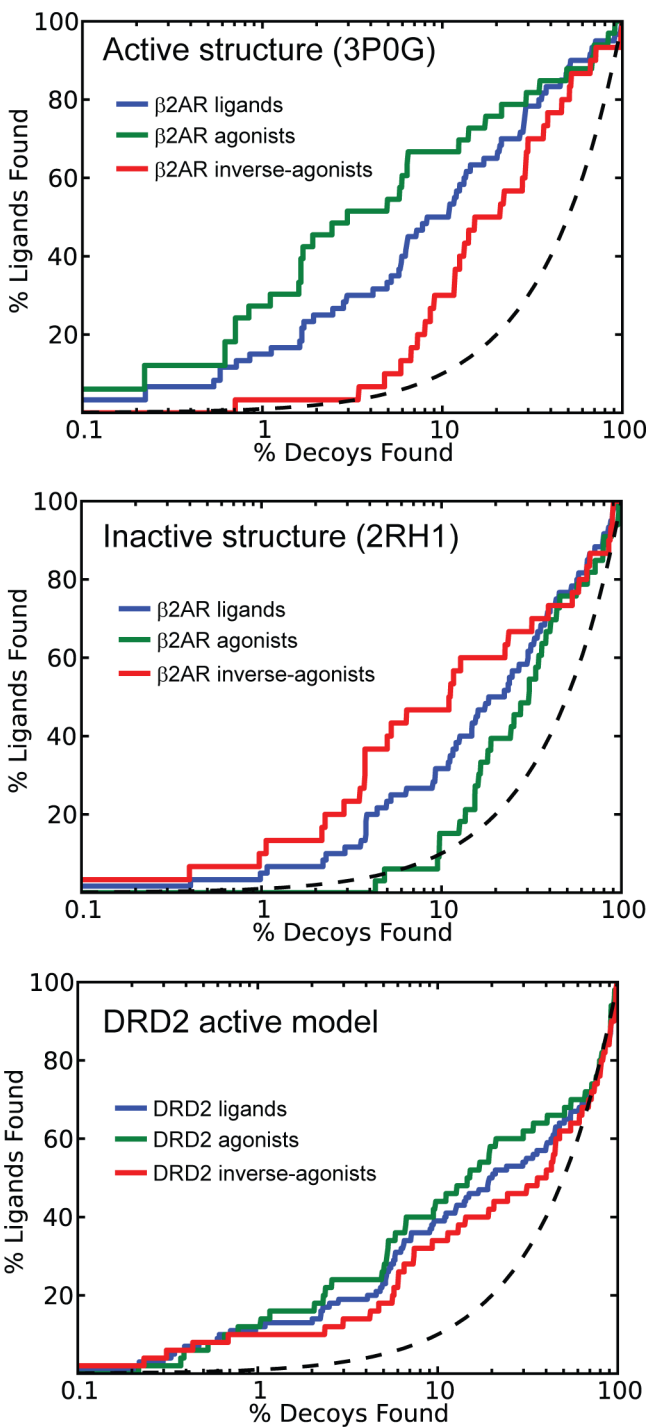

**Figure S1: Retrospective enrichment of known  $\beta$ 2AR ligands from a set of computationally matched decoys.** (Top) Retrospective enrichment using the  $\beta$ 2AR active structure, with 60 known ligands (blue), of which 30 are agonists (green) and 30 are inverse-agonists (red). The docked set also contains 2400 computationally generated matched decoys. (Middle) Retrospective enrichment using the inactive  $\beta$ 2AR structure with the same set of 60 known ligands and 3840 decoys. (Bottom) Retrospective enrichment using the active DRD2 model with 100 known ligands (blue), of which 50 are known agonists (green) and 50 are known antagonists (red), from 6400 computationally matched decoys.

## [<sup>125</sup>I]CYP Competition Binding Assay

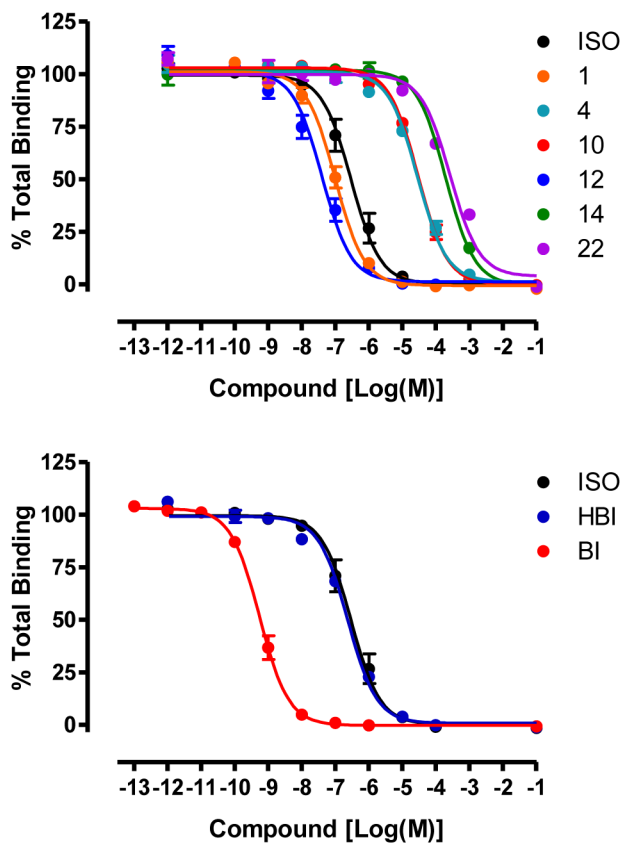

**Figure S2: Binding assays for the  $\beta$ 2AR hits predicted by virtual screening, measured by radioligand displacement of [<sup>125</sup>I]cyanopindolol.** (Top) Dose-response competition curves for the six  $\beta$ 2AR agonists discovered in the virtual screen. (Bottom) Control compounds Isoproterenol (ISO), hydroxybenzylisoproterenol (HBI), and BI-167107 (BI). Each data point represents mean  $\pm$  S.E. obtained from three independent experiments done in duplicates. Dose-dependent competition curves for each compound were obtained using the nonlinear iterative curve-fitting computer program Prism.

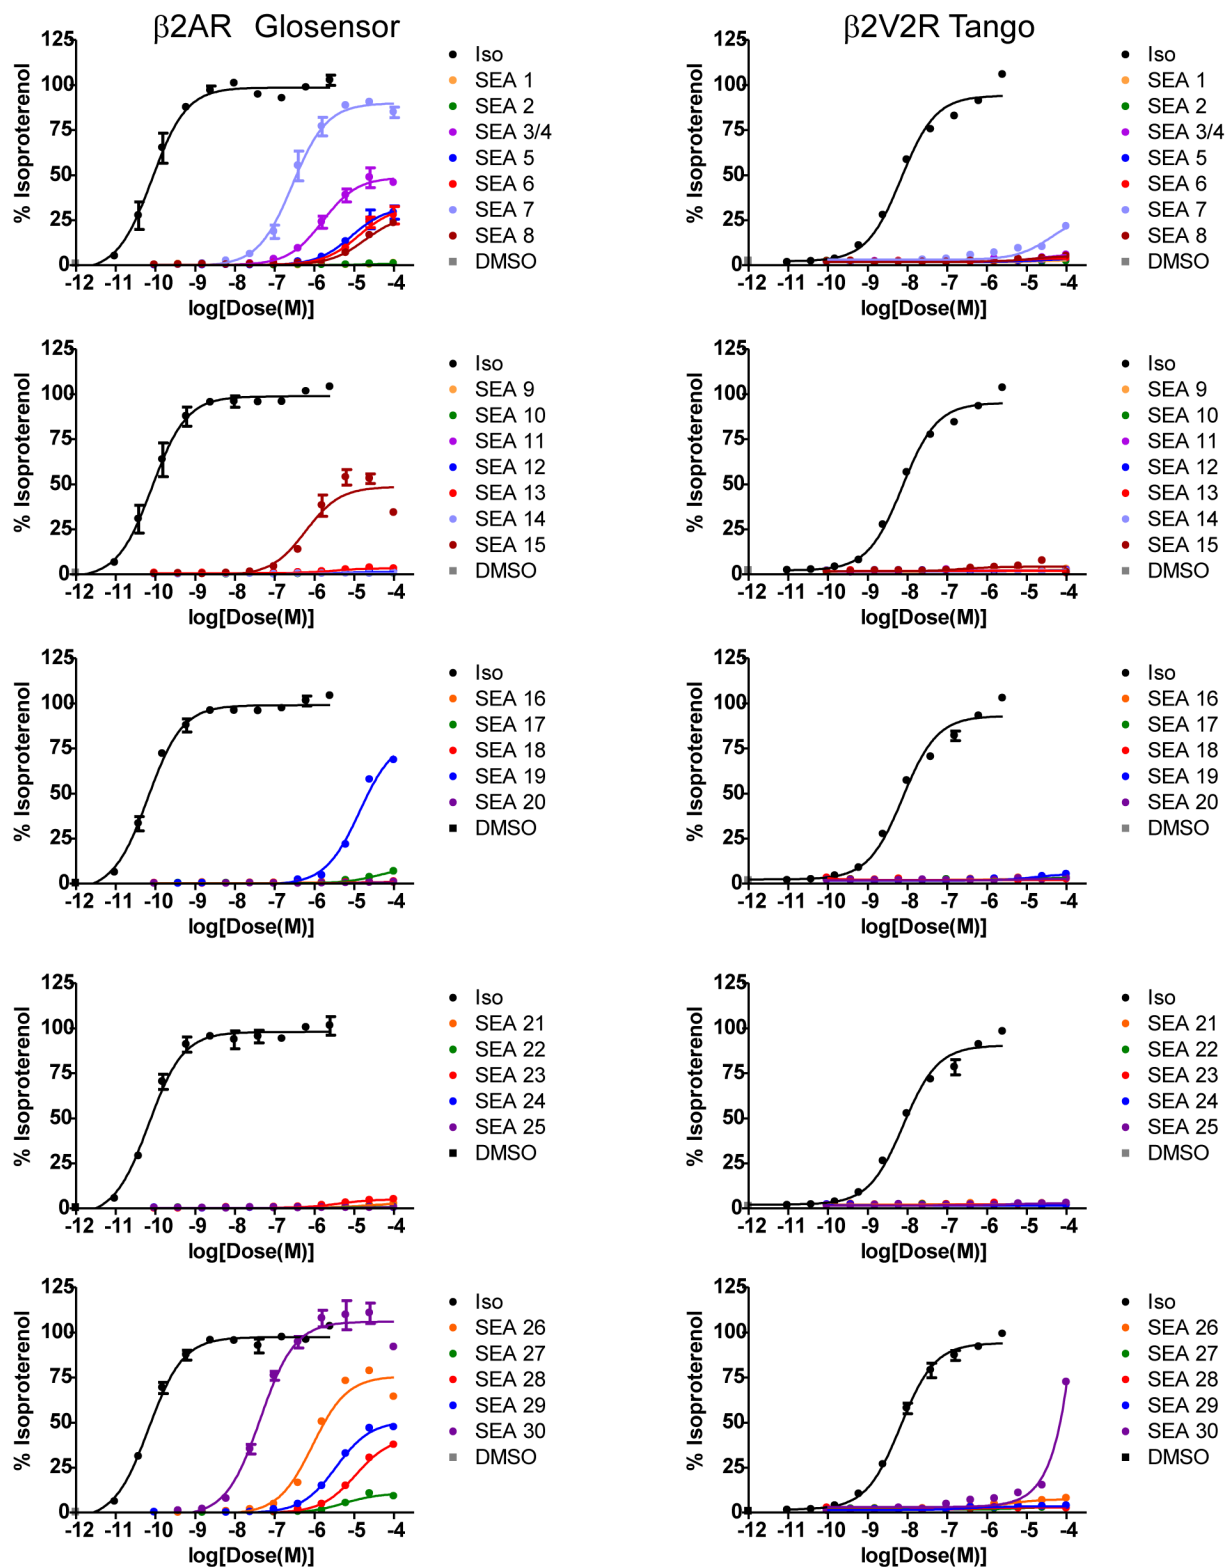

**Figure S3: Dose-response curves for 30 compounds predicted by 2D chemical similarity to be partially  $\beta$ -arrestin biased agonists.** (Left) Measurement of cAMP formation using the GloSensor assay. (Right) Measurement of  $\beta$ -arrestin recruitment using the Tango assay. Each data point represents mean  $\pm$  S.E. and dose response curves for each compound were obtained from three independent experiments done in duplicates..

|                     |                                                                                                                         |
|---------------------|-------------------------------------------------------------------------------------------------------------------------|
| TEMPLATE_PDBID_3P0G | -----DVTQQRDEVVWVGMGI VMSLI VLAI VFGNVLVI TAI A                                                                         |
| DRD2                | MDP L N L S W Y D D D L E R Q N W S R P F N G S D G K A D R P H Y N Y A T L L T L L I A V I V F G N V L V C M A V S     |
| TEMPLATE_PDBID_3P0G | K F E R L Q T V T N Y F I T S L A C A D L V M G L A V V P F G A A H I L M K - M W T F G N F W C E F W T S I D V L C V T |
| DRD2                | R E K A L Q T T T N Y L I V S L A V A D L L V A T L V M P W V V Y L E V V G E - W K F S R I H C D I F V T L D V M M C T |
| TEMPLATE_PDBID_3P0G | A S I E T L C V I A V D R Y F A I T S P F K Y Q S - - - L L T K N K A R V I I L M V W I V S G L T S F L P I Q M H W Y R |
| DRD2                | A S I L N L C A I S I D R Y T A V A M P M L Y N - - T R Y S S K R R V T V M I S I V W W L S F T I S C P L L F G L N N - |
| TEMPLATE_PDBID_3P0G | A T H Q E A I N - - - C Y A E E T - C C D F F T N Q A Y A I A S S I V S F Y V P L V I M V F V Y S R V F Q E A K - - -   |
| DRD2                | A D Q N E - - - - - - - - - - C I I A - N P A F V V Y S S I V S F Y V P F I V T L L V Y I K I Y I V L R - R R           |
| TEMPLATE_PDBID_3P0G | -----                                                                                                                   |
| DRD2                | R K R V N T K R S S R A F R A H L R A P L K G N C T H P E D M K L C T V I M K S N G S F P V N R R R V E A A R R A Q E L |
| TEMPLATE_PDBID_3P0G | -----                                                                                                                   |
| DRD2                | E M E M L S S T S P P E R T R Y S P I P P S H H Q L T L P D P S H H G L H S T P D S P A K P E K N G H A K D H P K I A K |
| TEMPLATE_PDBID_3P0G | -----L K E H K A L K T L G I I M G T F T L C W L P F F I V N I V H V I                                                  |
| DRD2                | I F E I Q T M P N G K T R T S L K T M S R R - K L S Q Q K E K K A T Q M L A I V L G V F I I C W L P F F I T H I L N I H |
| TEMPLATE_PDBID_3P0G | Q D N - - - - L I R K E V Y I L L N W I G Y V N S G F N P L I Y - C R S P D F R I A F Q E L L C L R R - - - - -         |
| DRD2                | C D - - - - - C N I P P V L Y S A F T W L G Y V N S A V N P I I Y T T F N I E F R K A F L K I L H C - - - - -           |

**Figure S4: Sequence alignment of dopamine D2 receptor to the template  $\beta$ 2AR (PDBID 3P0G)**

## References

- 1 Carlsson, J. *et al.* Ligand discovery from a dopamine D3 receptor homology model and crystal structure. *Nature chemical biology* **7**, 769-778 (2011).
- 2 Mysinger, M. M. *et al.* Structure-based ligand discovery for the protein-protein interface of chemokine receptor CXCR4. *Proc Natl Acad Sci U S A* **109**, 5517-5522 (2012).
